# Supplementary material
Source: HighWire-hosted journal article supplement (https://www.cmajopen.ca/highwire/filestream/81203/field_highwire_adjunct_files/1/2017-0128-2-at.pdf)
Supplement: 2017-0128-2-at.pdf [file 2017-0128-2-at.pdf]

**Appendix 2 (as supplied by the authors):** Governance of the Preterm Birth Network

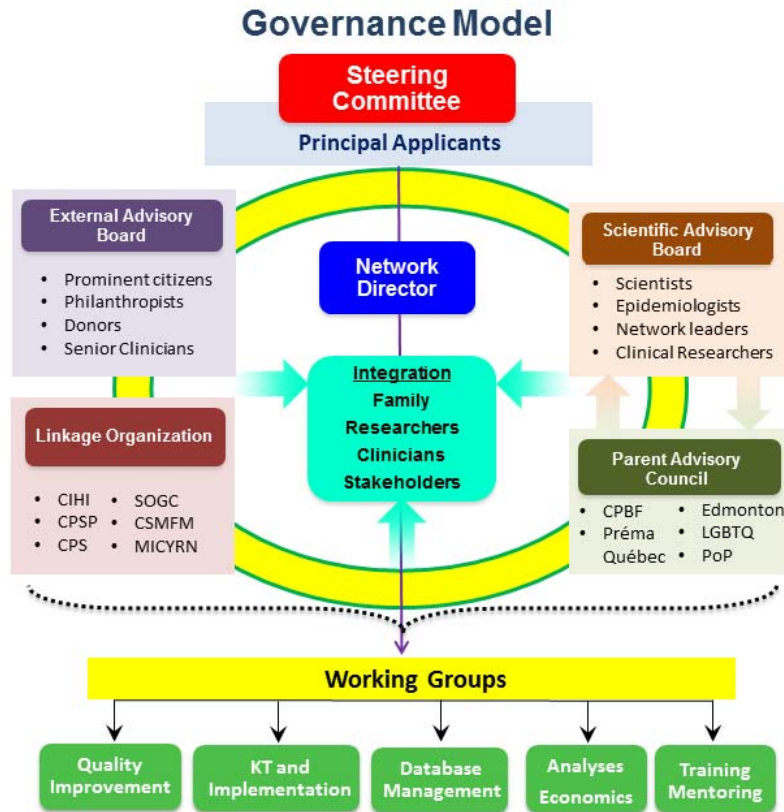

A Steering Committee comprised of fourteen members (the principal applicants of the Canadian Institute of Health Research PTB Network Team Grant [PBN150642]) will be responsible for the overall governance of the Preterm Birth (PTB) Network. The PTB Network Director, Dr. Prakesh Shah, will provide scientific leadership and direction to the PTB Network and Steering Committee while acting as a liaison between the four advisory boards and five working groups. The Scientific Advisory Board, Parent Advisory Council, External Advisory Board, and Linkage Organizations will each provide recommendations, guidance, and dissemination opportunities in their respective areas of expertise. PTB Network Annual reports will be used to benchmark the performance of the PTB Network and partnering hospitals, particularly following the implementation of QI initiatives. Note: CIHI = Canadian Institute for Health Information, CPBF = Canadian Premature Babies Foundation, CPS = Canadian Paediatric Society, CPSP = Canadian Paediatric Surveillance Program, CSMFM = Canadian Society of Maternal Fetal Medicine, KT = Knowledge Translation, MICYRN = Maternal Infant Child Youth Research Network, PoP = Parents of Premies, SOGC = Society of Obstetricians and Gynaecologists of Canada.
